# Supplementary material for: Synergetic role of charge transfer and strain engineering in improving the catalysis of Pd single-atom-thick motifs stabilized on a defect-free MoS2/Ag(Au)(111) heterostructure
Source: Royal Society of Chemistry journal article supplement (doi:10.1039/d0ta05479h), 2020-01-01
Supplement: d0ta05479h1.pdf [file d0ta05479h1.pdf]

**Electronic Supplementary Information for**

**Synergetic Role of Charge Transfer and Strain Engineering in Improving the Catalysis of Pd Single-Atomic-thick motifs Stabilized on Defect-free MoS<sub>2</sub>/Ag(Au)(111) Heterostructure**

Zhixin Su,<sup>a</sup> Rui pang,<sup>a</sup> Xiaoyan Ren,<sup>\*a</sup> and Shunfang Li<sup>\*a</sup>

*<sup>a</sup>School of Physics and Microelectronics, Zhengzhou University, Zhengzhou, Henan 450001, China.*

**This file includes:**

**Table S1** Work function of the typical systems.

**Table S2** Calculated O-O bond lengths, O<sub>2</sub>-CO distances (d in Å) in the key steps for CO oxidations via TER mechanism.

**Table S3** Adsorption energies of CO, O<sub>2</sub>, 2CO, and O<sub>2</sub>+CO on only one Pd active site

**Fig. S1** (a) Geometric structures and average cohesive energies (ACE) of the most stable structures of Pd<sub>N</sub> clusters, (b) The second order difference of the ACE

**Fig. S2** Average adsorption energy (E<sub>a</sub>) of the most stable structural configurations of 3D-Pd<sub>N</sub> species (N=4-7) with different configurations and adsorption sites.

**Fig. S3** Average adsorption energy (E<sub>a</sub>) of the most stable structural configurations of 2D-Pd<sub>N</sub> species (N=3-7) with different configurations and adsorption sites.

**Fig. S4** Energy barrier for the phase transition from the 2D to 3D configurations.

**Fig. S5** Electronic density of states (DOS) of CO adsorbed on (a) Pd<sub>1</sub>/MoS<sub>2</sub>, (b) Pd<sub>1</sub>/MoS<sub>2</sub>/5.18%, (c) Pd<sub>1</sub>/MoS<sub>2</sub>/Au(111), and (d) Pd<sub>1</sub>/MoS<sub>2</sub>/Ag(111).

**Fig. S6** Schematic show TER mechanism of the CO oxidation on Pd<sub>1</sub>/substrates.

**Fig. S7** Charge transfer (ΔQ) analysis of the CO oxidation (CLH) processes on 2D-Pd<sub>3</sub> species deposited on MoS<sub>2</sub>, MoS<sub>2</sub>/5.18%, MoS<sub>2</sub>/Au(111), and MoS<sub>2</sub>/Ag(111) substrates.

**Table S1** Calculated work function (WF in eV) of the typical systems.

|    | MoS <sub>2</sub> | Au(111) | Ag(111) | MoS <sub>2</sub> /<br>Au(111) | MoS <sub>2</sub> /<br>Ag(111) | Pd <sub>1</sub> /MoS <sub>2</sub> /<br>Au(111) | Pd <sub>1</sub> /MoS <sub>2</sub> /<br>Ag(111) |
|----|------------------|---------|---------|-------------------------------|-------------------------------|------------------------------------------------|------------------------------------------------|
| WF | 5.68             | 5.18    | 4.61    | 5.36                          | 4.76                          | 4.96                                           | 4.67                                           |

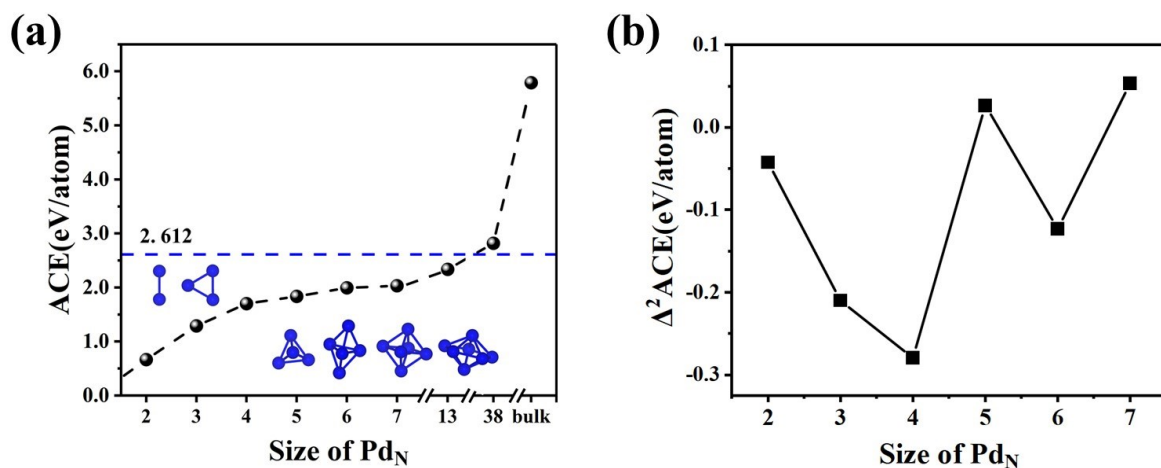

**Fig. S1** (a) Geometric structures and average cohesive energies (ACE) of the most stable structures of Pd<sub>N</sub> clusters ( $N = 2-7$ ) in gas phase. (b) The second order difference of the ACE presented in (a).

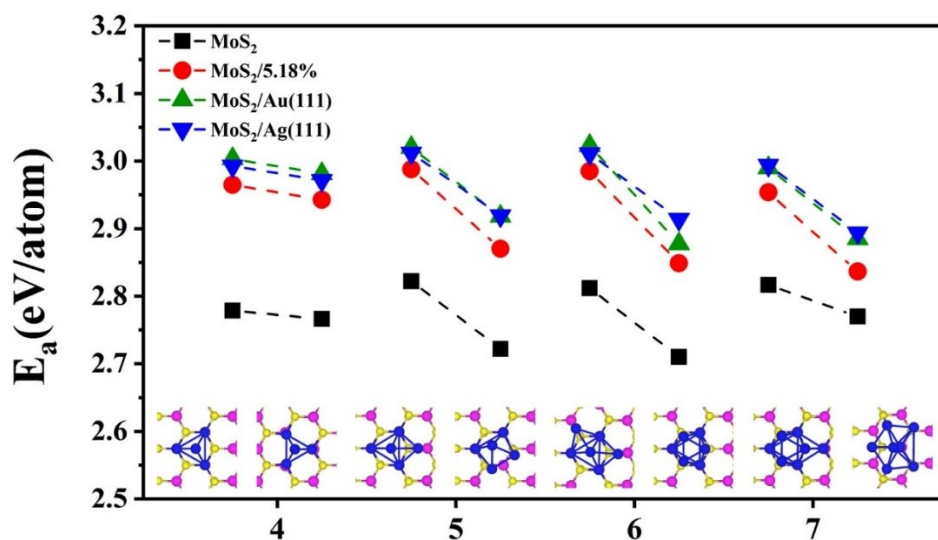

**Fig. S2** Average adsorption energy ( $E_a$ ) of the most stable structural configurations of 3D-Pd<sub>N</sub> species ( $N=4-7$ ) with different configurations and adsorption sites.

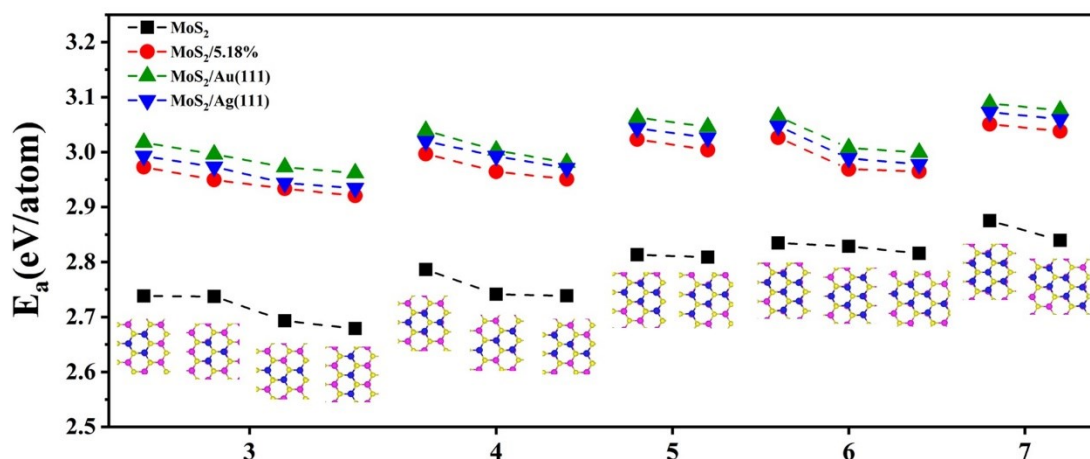

**Fig. S3** Average adsorption energy ( $E_a$ ) of the most stable structural configurations of 2D-Pd<sub>N</sub> species ( $N=3-7$ ) with different configurations and adsorption sites.

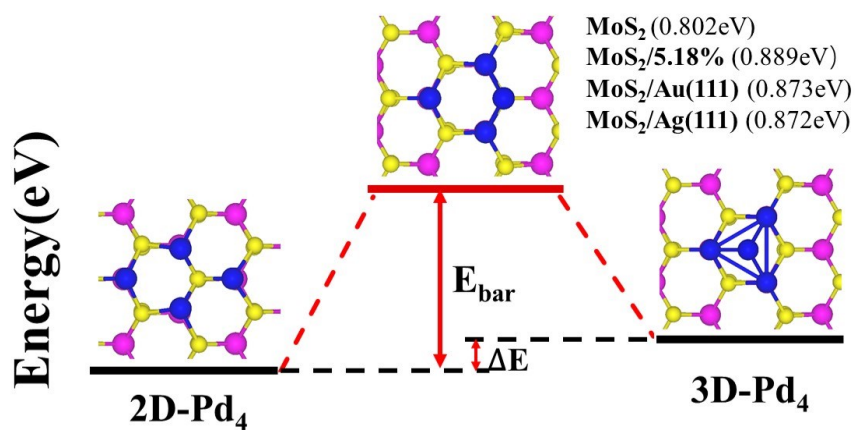

**Fig. S4** Energy barrier ( $E_{\text{bar}}$ ) for the phase transition from the 2D to 3D configurations.

we have demonstrated that, it is 2D-Pd<sub>3</sub> (rather than 2D-Pd<sub>4</sub>) which displays significantly magic properties in the stability. Therefore, in experiment, 2D-Pd<sub>3</sub>

possesses much longer life time than that of both 2D(3D)-Pd<sub>4</sub> and Pd<sub>5</sub>. Moreover, as seen from **Fig. S4** even for the less stable species Pd<sub>4</sub>, the calculated energy barrier ( $E_{\text{bar}}$ ) for the phase transition from the 2D to 3D configurations is  $E_{\text{bar}} = 0.872$  eV, which is significantly higher than the CO oxidation reaction barrier of 0.410 eV. According to the Arrhenius form of  $R = R_0 \times \exp[-E_{\text{bar}}/(k_B T)]$ , with a typical prefactor of  $R_0 = 10^{12}/\text{s}$ , yielding a 2D to 3D phase transition rate of  $2.253 \times 10^{-3}/\text{s}$  at  $T \sim 300\text{K}$ ; nevertheless, the calculated  $E_{\text{bar}} = 0.763$  eV leads to a reaction rate of  $1.526 \times 10^{-1}/\text{s}$  at  $T \sim 300$  K for the phase transition from the 3D to 2D, which is about two orders of magnitude larger than that of the reversed process. These data suggest that, even though some 3D-Pd<sub>N</sub> cluster may coexist with the 2D-Pd<sub>N</sub> configurations, the 2D-Pd<sub>N</sub> motifs should be dominant in experimental observations.

**Table S2** Calculated O-O bond lengths, O<sub>2</sub>-CO distances (d in Å) in the key steps shown in **Fig. 5(a)** for CO oxidations via TER mechanism on Pd<sub>3</sub>/MoS<sub>2</sub>, Pd<sub>3</sub>/MoS<sub>2</sub>/5.18%, Pd<sub>3</sub>/MoS<sub>2</sub>/Au(111), and Pd<sub>3</sub>/MoS<sub>2</sub>/Ag(111).

| d(Å)                      | CO-O <sub>2</sub><br>(IS) | O-O<br>(IS) | CO-O <sub>2</sub><br>(TS1) | O-O<br>(TS1) | CO-O <sub>2</sub><br>(PS) | O-O<br>(PS) | O-O<br>(TS2) |
|---------------------------|---------------------------|-------------|----------------------------|--------------|---------------------------|-------------|--------------|
| MoS <sub>2</sub>          | 3.325                     | 1.273       | 1.843                      | 1.315        | 1.336                     | 1.434       | 1.434        |
| MoS <sub>2</sub> /5.18%   | 3.251                     | 1.277       | 1.748                      | 1.332        | 1.328                     | 1.440       | 1.772        |
| MoS <sub>2</sub> /Au(111) | 3.321                     | 1.275       | 1.746                      | 1.330        | 1.329                     | 1.440       | 1.774        |
| MoS <sub>2</sub> /Ag(111) | 3.255                     | 1.283       | 1.696                      | 1.347        | 1.357                     | 1.437       | 1.762        |

**Table S3** Adsorption energies ( $E_a$  in eV) of one CO, O<sub>2</sub>, two CO (2CO), and O<sub>2</sub> and CO (O<sub>2</sub>+CO) on only one Pd active site.

| $E_a$ (eV)                | CO    | O <sub>2</sub> | 2CO   | O <sub>2</sub> +CO |
|---------------------------|-------|----------------|-------|--------------------|
| MoS <sub>2</sub>          | 1.372 | 0.586          | 2.588 | 1.667              |
| MoS <sub>2</sub> /5.18%   | 1.106 | 0.562          | 2.290 | 1.385              |
| MoS <sub>2</sub> /Au(111) | 1.107 | 0.568          | 2.324 | 1.135              |
| MoS <sub>2</sub> /Ag(111) | 1.115 | 0.651          | 2.320 | 1.135              |

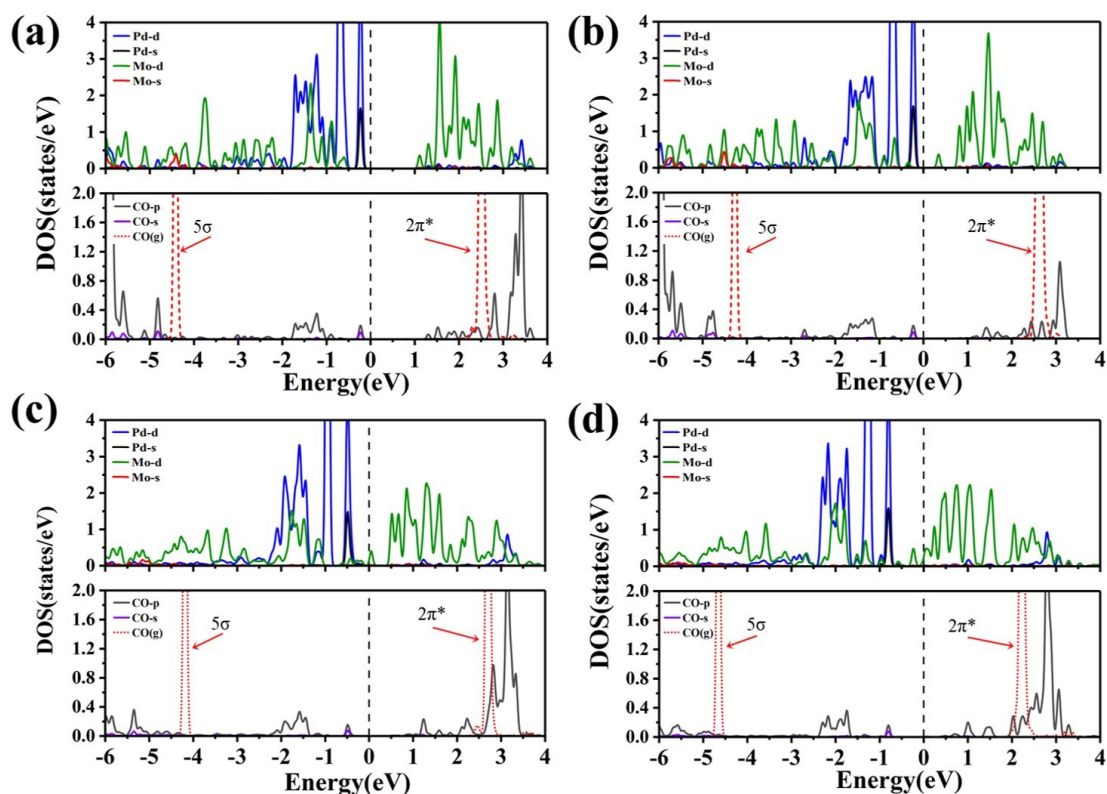

**Fig. S5** Electronic density of states (DOS) of CO adsorbed on (a) Pd<sub>1</sub>/MoS<sub>2</sub>, (b) Pd<sub>1</sub>/MoS<sub>2</sub>/5.18%, (c) Pd<sub>1</sub>/MoS<sub>2</sub>/Au(111), and (d) Pd<sub>1</sub>/MoS<sub>2</sub>/Ag(111). For comparison, the DOS of gas phase CO far (more than 5 Å) above the Pd<sub>1</sub>/substrates are also presented in red and dashed lines, with the Fermi levels shifted to zero.

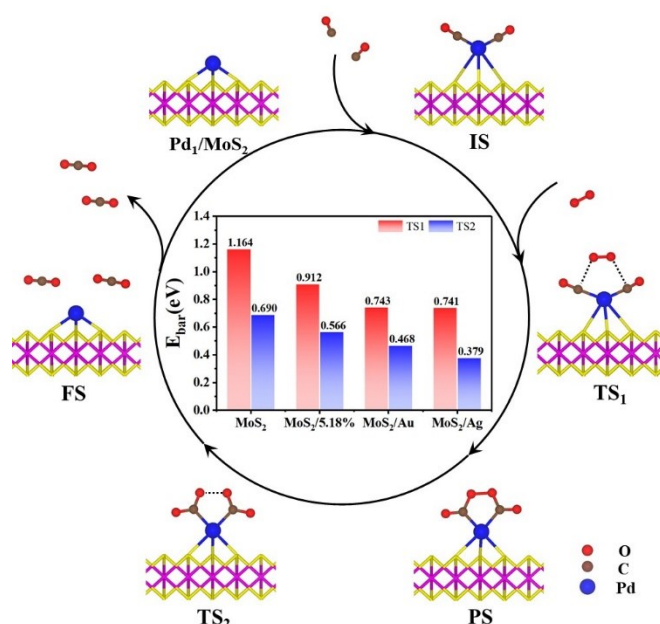

**Fig. S6** Schematic show of the CO oxidation on Pd<sub>1</sub>/substrates. TER mechanism, with the  $E_{\text{bar}}$  obtained in TS<sub>1</sub> and TS<sub>2</sub>.

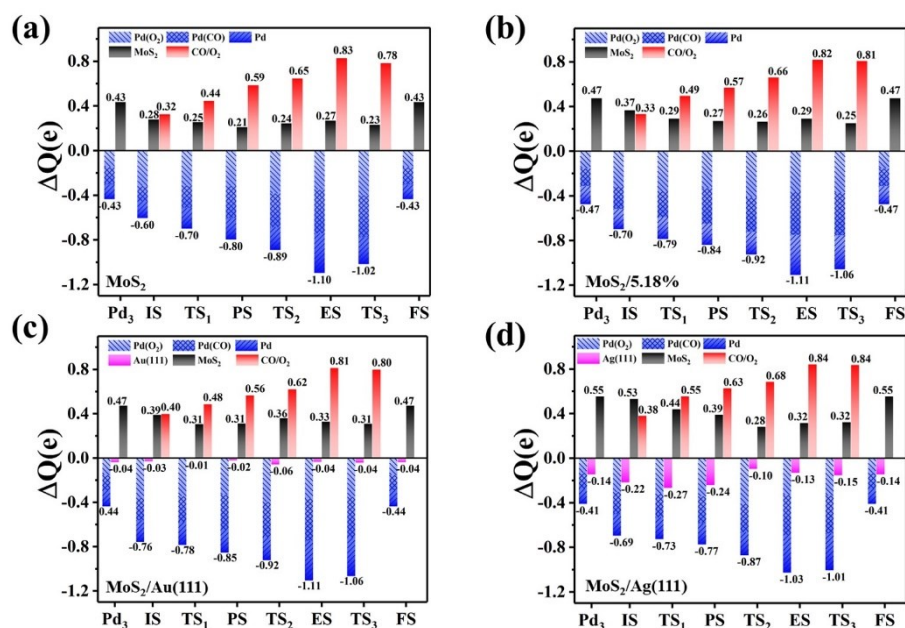

**Fig. S7** Charge transfer ( $\Delta Q$ ) analysis of the CO oxidation (CLH) processes on 2D-Pd<sub>3</sub> species deposited on MoS<sub>2</sub>, MoS<sub>2</sub>/5.18%, MoS<sub>2</sub>/Au(111), and MoS<sub>2</sub>/Ag(111) substrates. Here, the three Pd atoms in 2D-Pd<sub>3</sub> magic motifs are tabbed as Pd(O<sub>2</sub>), Pd(CO), and Pd, on which O<sub>2</sub>, CO, and no molecule is adsorbed, respectively.
